# Supplementary material for: Field Investigation of Effect of Plants on Cracks of Compacted Clay Covers at a Contaminated Site
Source: MDPI journal article supplement (doi:10.3390/ijerph19127248), 2022-06-13
Supplement: s1 [file s1]

Table S1. Main target contaminants in different depth of unsaturated zone

| Test point                              | Target Pollutants   | Contaminated Depth (m) | Contaminated Area (m <sup>2</sup> ) | Maximum concentration (mg/kg) |
|-----------------------------------------|---------------------|------------------------|-------------------------------------|-------------------------------|
| T-18, T-19, J-10                        | 1-Naphthylamine     | 7                      | 141                                 | 1180                          |
|                                         | TPH                 | 7                      |                                     | 1470                          |
| J-13                                    | 1-Naphthylamine     | 8                      | 161                                 | 13800                         |
|                                         | Naphthalene         | 9                      |                                     | 205                           |
| J-9, J-12                               | TPH                 | 7                      | 130                                 | 9880                          |
|                                         | Chlorobenzene       | 6                      |                                     | 618                           |
| J-15, J-16, J-11, T-22                  | Chlorobenzene       | 5                      | 610                                 | 447                           |
|                                         | 1,2-Dichlorobenzene | 5                      |                                     | 675                           |
|                                         | 1,3-Dichlorobenzene | 6                      |                                     | 91.9                          |
|                                         | Dichlorobenzene     | 6                      |                                     | 91.9                          |
| J-14, T-23, T-21                        | Dichlorobenzene     | 5                      | 320                                 | 218                           |
|                                         | Chlorotoluene       | 5                      |                                     | 9.86                          |
| T-20                                    | Naphthalene         | 5                      | 62                                  | 270                           |
|                                         | 1-Naphthylamine     | 5                      |                                     | 1630                          |
| T-24, T-15, J-8                         | TPH                 | 5                      | 71                                  | 14370                         |
| T-12, J-5                               | Naphthalene         | 10                     | 83                                  | 265                           |
|                                         | Chlorobenzene       | 9                      |                                     | 106                           |
| T-4, J-2, T-7                           | TPH                 | 8                      | 316                                 | 1240                          |
|                                         | 1-Naphthylamine     | 7                      |                                     | 990                           |
| J-3, J-6, T-5, T-8, T-11, T-9, J-7, J-4 | Chlorobenzene       | 6                      | 7315                                | 8840                          |
|                                         | 1,2-Dichlorobenzene | 5                      |                                     | 460                           |
|                                         | 1,3-Dichlorobenzene | 5                      |                                     | 139                           |
|                                         | 1,4-Dichlorobenzene | 6                      |                                     | 296                           |
|                                         | Chlorotoluene       | 7                      |                                     | 29.02                         |
|                                         | 1-Naphthylamine     | 5                      |                                     | 276                           |
|                                         | TPH                 | 5                      |                                     | 9020                          |
|                                         | 1,3-Dichlorobenzene | 6                      |                                     | 10.4                          |
|                                         | TPH                 | 8                      |                                     | 3240                          |
|                                         | TPH                 | 8                      |                                     | 3240                          |
